# Supplementary material for: Production of Recombinant Monoclonal Antibodies in the Egg White of Gene-Targeted Transgenic Chickens
Source: PubMed Central journal article supplement (PMC7823952; doi:10.3390/genes12010038), 2020-12-30
Supplement: genes-12-00038-s001.pdf [file genes-12-00038-s001.pdf]

**Figure S1. DNA sequence of mAb donor construct and location of features.**

|                                   |            |
|-----------------------------------|------------|
| OVA 5' homology region:           | 1–2791     |
| Lysozyme signal:                  | 2792–2845  |
| Heavy chain of the anti-HER2 mAb: | 2846–4194  |
| Furin 2A peptide:                 | 4195–4278  |
| Lysozyme signal:                  | 4279–4332  |
| Light chain of the anti-HER2 mAb: | 4333–4977  |
| bGH polyadenylation signal:       | 4982–5199  |
| Neomycin resistance gene unit:    | 5206–6896  |
| OVA 3' homology region:           | 6908–10102 |

```
1  GTCGACCTTA AGTCCTCAGA CTTGGCAAGG AGAATGTAGA TTTCTACAGT ATATATGTTT
61  TCACAAAAGG AAGGAGAGAA ACAAAGAAA ATGGCACTGA CTAACCTTCA GCTAGTGGTA
121 TAGGAAAGTA ATTCTGCTTA ACAGAGATTG CAGTGATCTC TATGTATGTC CTGAAGAATT
181 ATGTTGACT TTTTCCCTC ATTTTAAAT CAAACAGTGC TTTACAGAGG TCAGAATGGT
241 TTCTTTACTG TTTGTCAATT CTATTATTC AATACAGAAC AATAGCTTCT ATAACTGAAA
301 TATATTTGCT ATTGTATATT ATGATTGTCC CTCGAACCAT GAACACTCCT CCAGCTGAAT
361 TTCACAATTC CTCTGTCATC TGCCAGGCCA TTAAGTTATT CATGGAAGAT CTTTGAGGAA
421 CACTGCAAGT TCATATCATA AACACATTTG AAATTGAGTA TTGTTTTGCA TTGTATGGAG
481 CTATGTTTTG CTGTATCCTC AGAAAAAAG TTTGTTATAA AGCATTACACA CCCATAAAAA
541 GATAGATTTA AATATTCCAG CTATAGGAAA GAAAGTGCCT CTGCTCTTCA CTCTAGTCTC
601 AGTTGGCTCC TTCACATGCA CGCTTCTTTA TTTCTCTAT TTTGTCAAGA AAATAATAGG
661 TCACGTCTTG TTCTCACTTA TGTCTGCCT AGCATGGCTC AGATGCACGT TGTACATACA
721 AGAAGGATCA AATGAAACAG ACTTCTGGTC TGTTACTACA ACCATAGTAA TAAGCACACT
781 AACTAATAAT TGCTAATTAT GTTTTCCATC TCCAAGGTTT CCACATTTTT CTGTTTTCTT
841 AAAGATCCCA TTATCTGGTT GTAACCTGAAG CTCATGGAA CATGAGCAAT ATTTCCCAGT
901 CTTCTCTCCC ATCCAACAGT CCTGATGGAT TAGCAGAACA GGCAGAAAAC ACATTGTTAC
961 CCAGAATTTA AAATAATAT TTGCTCTCCA TTCAATCCA AATGGACCTA TTGAAACTAA
1021 AATCTAACCC AATCCCATTA AATGATTTCT ATGGCGTCAA AGGTCAAAC TCTGAAGGGA
1081 ACCTGTGGGT GGGTCACAAT TCAGGCTATA TATCCCCAG GGCTCAGCCA GTGTCTGTAC
1141 ATACAGCTAG AAAGCTGTAT TGCCTTAGC ACTCAAGCTC AAAAGGTAAG CAACTCTCTG
1201 GAATTACCTT CTCTCTATAT TAGCTCTTAC TTGCACCTAA ACTTTAAAAA ATTAACAATT
1261 ATTGTGTTAT GTGTTGTATC TTTAAGGGTG AAGTACCTGC GTGATACCCC CTATAAAAC
1321 TTCTCACCTG TGTATGCATT CTGCACTATT TTATTATGTG TAAAAGCTTT GTGTTTGTIT
1381 TCAGGAGGCT TATTTCTTGT GCTTAAAAA TGTTTTAAT TTCAGAACAT CTTATCCTGT
1441 CGTTCAGTAT CTGATATGCT TTGCAGTTTG CCTGATTAAC TTCTAGCCCT ACAGAGTGCA
1501 CAGAGAGCAA AATCATGGTG TTCAGTGAAT TCTGGGGAGT TATTTAATG TGAAAATTCT
1561 CTAGAAGTTT AATCCTGCA AAGTGCAGCT GCTGATCACT ACACAAGATA AAAATGTGGG
1621 GGGTGCATAA ACGTATATTC TTACAATAAT AGATACATGT GAACTTGTAT ACAGAAAAGA
1681 AAATGAGAAA AATGTGTGTG CGTATACTCA CACACGTGGT CAGTAAAAAC TTTGAGGGG
1741 TTTAATACAG AAAATCCAAT CCTGAGGCCC CAGCACTCAG TACGCATATA AAGGGCTGGG
1801 CTCTGAAGGA CTTCTGACTT TCACAGATTA TATAAATCTC AGGAAAGCAA CTAGATTAT
1861 GCTGGCTCCA AAAGCTGTGC TTTATATAAG CACTCTGGCT ATACAATAGT TGTACAGTTC
1921 AGCTCTTTAT AATAGAAAAC GACAGAACA GTATAAATCT TCTATTGGTC TATGTCATGA
1981 ACAAGAATTC ATTCAGTGGC TCTGTTTTAT AGTAAACATT GCTATTTTAT CATGCTGCA
2041 TTTCTCTTCT GTCTGAATGT CACCACTAAA ATTTAACTCC ACAGAAAGTT TATACTACAG
2101 TACACATGCA TATCTTTGAG CAAAGCAAAC CATACTGAA AGTGCAATAG AGCAGAATAT
2161 GAATTACATG CGTGTCTTTC TCCTAGACTA CATGACCCCA TATAAATTAC ATTCCTTATC
2221 TATTCTGCCA TCACCAAAC AAAGGTAAAA ATACTTTTGA AGATCTACTC ATAGCAAGTA
2281 TGTGTCAACA AACAGATATT TCTCTACATT TATTTTTAGG GAATAAAAAA AAGAAATAAA
2341 ATAGTCAGCA AGCCTCTGCT TTCTCATATA TCTGTCCAAA CCTAAAGTTT ACTGAAATTT
2401 GCTCTTTGAA TTTCCAGTTT TGCAAGCCTA TCAGATTGTG TTTAATCAG AGGTAAGTAA
2461 AAGTATCAAT GAATTCTAGC TTTCACTGAA CAAAAATATG TAGAGGCAAC TGGCTTCTGG
2521 GACAGTTTGC TACCCAAAAG ACAACTGAAT GCAAATACAT AAATAGATTT ATGAATATGG
```

2581 TTTTGAACAT GCACATGAGA GGTGGATATA GCAACAGACA CATTACCACA GAATTACTTT  
2641 AAAACTACTT GTTAACATTT AATTGCCTAA AAAGTCTCG TAATTTACTG TTGTAGCCTA  
2701 CCATAGAGTA CCCTGCATGG TACTATGTAC AGCATTCCAT CCTTACATTT TCACTGTTCT  
2761 GCTGTTTGCT CTAGACAACCT CAGAGTTCAC CATGAGGTCT TTGCTAATCT TGGTGCTTTG  
2821 CTTCTGCCC CTGGCTGCTC TGGGGGAGGT CCAGCTGGTG GAGTCCGGCG  
GAGGGCTGGT  
2881 CCAGCCTGGA GGCAGCCTGA GACTGAGCTG TGCTGCCAGC GGGTTCAATA TCAAGGATAC  
2941 CTACATCCAC TGGGTGAGGC AGGCCCCCGG AAAGGGCCTG GAATGGGTG  
CCAGGATTTA  
3001 CCAACTAAT GGGTATACTC GGTACGCCGA TTCCGTCAA GGCAGATTTA CCATTAGCGC  
3061 AGACACCAGC AAAACACAG CATACTGCA GATGAAGTCC CTGAGAGCTG AAGACACAGC  
3121 TGTGTATTAT TGCTCCCGGT GGGGGGGCGA CGGCTTTTAT GCCATGGACT ACTGGGGCCA  
3181 GGAACCCCTG GTCACCGTCT CCTCAGCCTC CACCAAGGGC CCATCGGTCT  
TCCCCCTGGC  
3241 ACCCTCCTCC AAGAGCACCT CTGGGGGCAC AGCAGCCCTG GGCTGCCTGG  
TCAAGGACTA  
3301 CTTCCCCGAA CCGGTGACGG TGTCGTGGAA CTCAGGCGCC CTGACCAGCG  
GCGTGACAC  
3361 CTTCCCGGCT GTCCTACAGT CCTCAGGACT CTAATCCCTC AGCAGCGTGG TGACCGTGCC  
3421 CTCCAGCAGC TTGGGCACCC AGACCTACAT CTGCAACGTG AATCACAAGC CCAGCAACAC  
3481 CAAGGTGGAC AAGAAAGTTG AGCCCAAATC TTGTGACAAA ACTCACACAT GCCACCGTG  
3541 CCCAGCACCT GAAGTCTGG GGGGACCGTC AGTCTTCCTC TTCCCCCAA AACCCAAGGA  
3601 CACCCTCATG ATCTCCCGGA CCCCTGAGGT CACATGCGTG GTGGTGGACG  
TGAGCCACGA  
3661 AGACCCTGAG GTCAAGTTCA ACTGGTACGT GGACGGCGTG GAGGTGCATA ATGCCAAGAC  
3721 AAAGCCGCGG GAGGAGCAGT ACAACAGCAC GTACCGTGTG GTCAGCGTCC  
TCACCGTCTC  
3781 GCACCAGGAC TGGCTGAATG GCAAGGAGTA CAAGTGCAAG GTCTCCAACA AAGCCCTCCC  
3841 AGCCCCATC GAGAAAACCA TCTCCAAAGC CAAAGGGCAG CCCCAGAGAAC CACAGGTGTA  
3901 CACCCTGCCC CCATCCCGGG ATGAGCTGAC CAAGAACCAG GTCAGCCTGA  
CCTGCCTGGT  
3961 CAAAGGCTTC TATCCAGCG ACATCGCCGT GGAGTGGGAG AGCAATGGGC  
AGCCGGAGAA  
4021 CACTACAAG ACCACGCCTC CCGTGTGGA CTCCGACGGC TCCTTCTTCC TCTACAGCAA  
4081 GCTCACCGTG GACAAGAGCA GGTGGCAGCA GGGGAACGTC TTCTCATGCT  
CCGTGATGCA  
4141 TGAGGCTCTG CACAACCACT ACACGCAGAA GAGCCTCTCC CTGTCTCCGG GTAAACGGGG  
4201 CAAGAGAGCC CCCGTGAAGC AGACCCTGAA CTTGACCTG CTGAAGCTGG  
CCGGCGACGT  
4261 GGAGTCCAAC CCCGGCCCCA TCGCTCCCT CTTGATTCTC GTCTTGTGTT TTTTGCCACT  
4321 GGCCGCTCTC GGCACATAC AGATGACCCA GAGCCCCTCT TCTCTCTCAG CATCAGTGGC  
4381 CGACAGGGT ACAATTACCT GCCGGCTAG CCAAGATGTG AACACAGCCG TGGTGTGTA  
4441 TCAGCAGAAA CCTGGGAAG CCCCAAAATC GCTGATTTAT TCTGCTAGCT TCCTGTATTC  
4501 TGGGGTGCCT TCCAGATTCT CCGGATCCAG ATCCGGCACT GATTTACAC TGACCATCAG  
4561 CAGCCTCCAG CCCGAGGATT TTGCAACATA CTAATGTCAG CAACACTACA CTAATCCTCC  
4621 AACCTTTGGC CAAGGCACCA AGGTTGAAAT CAAGCGTACG GTGGCTGCAC CATCTGTCTT  
4681 CATCTTCCCG CCATCTGATG AGCAGTTGAA ATCTGGAAGT GCCTCTGTTG TGTGCCTGCT  
4741 GAATAACTTC TATCCAGAG AGGCCAAAGT ACAGTGGAAG GTGGATAACG CCCTCAAATC  
4801 GGGTAAGTCC CAGGAGAGTG TCACAGAGCA GGACAGCAAG GACAGCACCT  
ACAGCCTCAG  
4861 CAGCACCTG ACGCTGAGCA AAGCAGACTA CGAGAAACAC AAAGTCTACG CCTGCGAAGT  
4921 CACCCATCAG GGCCTGAGCT CGCCGTCAC AAAGAGCTTC AACAGGGGAG AGTGTTAGTG  
4981 GACTCGCTGA TCAGCCTCGA CTTTGCCTTC TAGTTGCCAG CCATCTGTTG TTTGCCCTC  
5041 CCCCCTGCCT TCCTTGACCC TGAAGGTGC CACTCCCACT GTCCTTTCCT AATAAAATGA  
5101 GGAATTGCA TCGCATTGTC TGAGTAGGTG TCATTCTATT CTGGGGGGTG GGGTGGGGCA  
5161 GGACAGCAAG GGGGAGGATT GGAAGACAA TAGCAGGCAG TCGAGTTCAA ATATGTATCC  
5221 GCTCATGAGA CAATAACCCT GATAAATGCT TCAATAATAT TGAAGGGA AGAGTCTGA  
5281 GCGGAAAGA ACCAGCTGTG GAATGTGTGT CAGTTAGGGT GTGAAAGTC  
CCAGGCTCC  
5341 CCAGCAGGCA GAAGTATGCA AAGCATGCAT CTCAATTAGT CAGCAACCAG GTGTGGAAAG  
5401 TCCCAGGCT CCCAGCAGG CAGAAGTATG CAAAGCATGC ATCTCAATTA GTCAGCAACC  
5461 ATAGTCCCGC CCCTAACTCC GCCATCCCG CCCCTAACTC CGCCAGTTC CGCCATTCT  
5521 CCGCCCCATG GCTGACTAAT TTTTTTATT TATGCAGAGG CCGAGGCCGC CTCGGCCTCT

5581 GAGCTATTCC AGAAGTAGTG AGGAGGCTTT TTTGGAGGCC TAGGCTTTTG CAAAGATCGA  
5641 TCAAGAGACA GGATGAGGAT CGTTTCGCAT GATTGAACAA GATGGATTGC ACGCAGGTTG  
5701 TCCGGCCGCT TGGGTGGAGA GGCTATTCGG CTATGACTGG GCACAACAGA  
CAATCGGCTG  
5761 CTCTGATGCC GCCGTGTTCC GGCTGTCAGC GCAGGGGCGC CCGGTTCTTT TTGTCAAGAC  
5821 CGACCTGTCC GGTGCCCTGA ATGAACTGCA AGACGAGGCA GCGCGGCTAT  
CGTGGCTGGC  
5881 CACGACGGGC GTTCCTTGCG CAGCTGTGCT CGACGTTGTC ACTGAAGCGG  
GAAGGGACTG  
5941 GCTGCTATTG GGCGAAGTGC CGGGGCAGGA TCTCCTGTCA TCTCACCTTG CTCCTGCCGA  
6001 GAAAGTATCC ATCATGGCTG ATGCAATGCG GCGGCTGCAT ACGCTTGATC CGGCTACCTG  
6061 CCCATTCGAC CACCAAGCGA AACATCGCAT CGAGCGAGCA CGTACTCGGA  
TGGAAGCCGG  
6121 TCTTGTGAT CAGGATGATC TGGACGAAGA GCATCAGGGG CTCGCGCCAG CCGAACTGTT  
6181 CGCCAGGCTC AAGGCGAGCA TGCCCCACGG CGAGGATCTC GTCGTGACCC  
ATGGCGATGC  
6241 CTGCTTGCCG AATATCATGG TGAAAAATGG CCGCTTTTCT GGATTCATCG ACTGTGGCCG  
6301 GCTGGGTGTG GCGGACCGCT ATCAGGACAT AGCGTTGGCT ACCCGTGATA TTGCTGAAGA  
6361 GCTTGGCGGC GAATGGGCTG ACCGCTTCTC CTGTCTTAC GGTATCGCCG CTCCCGATTG  
6421 GCAGCGCATC GCCTTCTATC GCCTTCTTGA CGAGTTCTTC TGAGCGGGAC TCTGGGGTTC  
6481 GAAAGTACCG ACAAAGCGAC GCCCAACTG CCATCACGAG ATTTGATTC CACCGCCGCC  
6541 TTCTATGAAA GTTTGGGCTT CGGAATCGTT TTCCGGGACG CCGGCTGGAT GATCCTCCAG  
6601 CGCGGGGATC TCATGCTGGA GTTCTTCGCC CACCCTAGGG GGAGGCTAAC  
TGAAACACGG  
6661 AAGGAGACAA TACCGGAAGG AACCCGCGCT ATGACGGCAA TAAAAAGACA GAATAAAACG  
6721 CACGGTGTG GGTGCTTTGT TCATAAACGC GGGGTTCCGGT CCCAGGGCTG GCACTCTGTC  
6781 GATACCCAC CGAGACCCCA TTGGGGCCAA TACGCCCGCG TTTCTTCTT TTCCCCACCC  
6841 CACCCCCCAA GTTCGGGTGA AGGCCAGGG CTCGCAGCCA ACGTCGGGGC  
GCAGGTACC  
6901 AGTGATAATC GAATCCCGC GGCCGCGGGA ATTCGATTCC ATCGGTGCAG CAAGCATGGA  
6961 ATTTTGTGTTT GATGTATTCA AGGAGCTCAA AGTCCACCAT GCCAATGAGA ACATCTTCTA  
7021 CTGCCCCATT GCCATCATGT CAGCTCTAGC CATGGTATAC CTGGGTGCAA AAGACAGCAC  
7081 CAGGACACAG ATAAATAAGG TGAGCCTACA GTTAAAGATT AAAACCTTTG CCCTGCTCAA  
7141 TGGAGCCACA GCACTTAATT GTATGATAAT GTCCTTGGG AACTGCATAG CTCAGAGGCT  
7201 GAAAATCTGA AACCAGAGTT ATCTAAAAGT GTGGCCACCT CCAACTCCCA GAGTGTACC  
7261 CAAATGCACT AGCTAGAAAT CTTGAACTG GATTGCATAA CTTCTTTTG TCATAACCAT  
7321 TATTTAGCT ACTATTATTT TCAATTACAG GTTGTTCGCT TTGATAAACT TCCAGGATTC  
7381 GGAGACAGTA TTGAAGCTCA GGTACAGAAA TAATTTACC TCCTTCTCTA TGTCCTTTT  
7441 CTCTGGAAGC AAAATACAGC AGATGAAGCA ATCTTTAGC TGTTCCAAGC CCTCTCTGAT  
7501 GAGCAGCTAG TGCTCTGCAT CCAGCAGTTG GGAGAACACT GTTCATAAGA ACAGAGAAAA  
7561 AGAAGGAAGT AACAGGGGAT TCAGAACAAA CAGAAGATAA AACTCAGGAC AAAAATACCG  
7621 TGTGAATGAG GAAACTTGTG GATATTTGTA CGCTTAAGCA AGACAGCTAG ATGATTGCG  
7681 ATAAATGGGT CTGGTTGAAA AAGAAGGAAA GCCTGGCTGA TCTGCTGGAG CTAGATTATT  
7741 GCAGCAGGTA GGCAGGAGTT CCCTAGAGAA AAGTATGAGG GAATTACAGA AGAAAAACAG  
7801 CACAAAATTG TAAATATTGG AAAAGGACCA CATCAGTGTA GTTACTAGCA GTAAGACAGA  
7861 CAGGATGAAA AATAGTTTTG TAAACAGAAG TATCTAACTA CTTTACTCTG TTCATACT  
7921 ATGTAACC TACTAAGTAA TAAACTAGA ATAACAACAT CTTTCTTTCT CTTTGTATTG  
7981 AGTGTGGCAC ATCTGTAAAC GTTCACTCTT CACTTAGAGA CATCCTCAAC CAAATCACCA  
8041 AACCAAATGA TGTTTATTG TTCAGCCTTG CCAGTAGACT TTATGCTGAA GAGAGATACC  
8101 CAATCCTGCC AGTAAGTTGC TCTAAAATCT GATCTGAGTG TATTTCCATG CCAAAGCTCT  
8161 ACCATTCTGT AATGCAAAAA CAGTCAGAGT TCCACATGTT TCACTAAGAA AATTTCTTTT  
8221 TCTCTGTTT TTACAAATGA AAGAGAGGAC AAATAACATT TCTCTATCAC CGACCTGAAA  
8281 CTCTACAGTC TTCAGAGAAT GAATGGCTTG CTAAAAGAAT GTCAAATCTT ACCATACAGC  
8341 TATTTATAT TACTACTA AATACACTAT AAGGCATAGC ATGTAGTAAT AACTGTAAA  
8401 ATAGCTTTT AACTACTAT ATTATTAATA TCTGTAAATT CCAGTCTTGC ATTTACATT  
8461 TGCAAAACGT TTTGAAATC GATCTGAAA GCTGAATACT CTTGCTTAC AGGAATACTT  
8521 CAGTGTGTG AAGGAAGTGT ATAGAGGAGG CTTGGAACCT ATCAACTTTC AACAGCTGC  
8581 AGATCAAGCC AGAGAGCTCA TCAATTCCTG GGTAGAAAGT CAGACAAATG GTAAGGTAGA  
8641 ACATGCTTTG TACATAGTGA GAGTTGGTTC ACCCTAATAC TGAGAACCTG GATATAGCTC  
8701 AGCCAGCGTG CTTTGGTTC AAGCTTACCA GAGCTGTTGT ATGCCTGTTA AGCAGGGCAT  
8761 ACAGTCATGA GGCTCTTCAA AAATCTAAC AGACAAAGGG CAATGGAAAA TCGGAGTTAA  
8821 GGGATGGTAG GGATAAAATG CATAGAAAGA GGTACCACGA TTTGATTTT TGCCCTAATG  
8881 CCTCTCTGCG TGGTTCCTCA ATTTTCTAC TTCATTCTC ATCTCTCAG AGCATTCTT

8941 TCCCTCATGC TTGAAACACA GATGAAAGAC TGTGAATTCT AACTGAGATG AAAACATCCA  
9001 CAACCACACA ACCTCTGGTG TGGAGTCACA TTCTGTGAAG GCAAAAATA GGCCACGTAA  
9061 TCTATGTGTG CAAGCTACGT GTAAGCTATG TGTGTGACAG GACAATGTGA GGAACATACT  
9121 ATGTGCACAA GGACTGCAGA ATAAACAGGA GCAAAGTTTT TGAAGAAAAC AGAGTAAAT  
9181 CCCGTTTTCC TCTTTTGTTA CATTCTTTAC ATATATCTCA AATTTCTCT TTGGTTAGAA  
9241 GCAAGTAATA TTTATGTTTC TTGGTACTGT TTGGGTTGAA GACCATTCTG GGATAAGAGA  
9301 AATTCCAGTG GTTCTTCCCC TAATCATAAA ATGTACAGGT TTAGTTTTTT TGTAACACAG  
9361 AAATCTCTTC ATCTTTTATC TTTTGTTGTG ATTCTTTATA GAGAGAGAAA CAAGACTTAC  
9421 TGACAATAGC AGCAAGAAAA TCAATCTTGG AAGAACAAGA TTGCAGTTGC AAAAACAAC  
9481 CAATGTCCTT GCCCCTACAT CCTCTTCCCC ATAAATTCTA CATTCTCTAT CTACCTTGTG  
9541 CTTGCCAACA TGATATACGT AAATCTCTT TTCCTATTCA TTCTTAAAGG AATTATCAGA  
9601 AATGTCCTTC AGCCAAGCTC CGTGGATTCT CAAACTGCAA TGGTTCTGGT TAATGCCATT  
9661 GTCTTCAAAG GACTGTGGGA GAAAGCATTT AAGGATGAAG ACACACAAGC AATGCCTTTC  
9721 AGAGTGACTG AGGTATATGG GCATACCTTA GAGATGTAAT CTAGAATTTA TGAAGAGAGT  
9781 AGACATGTTG TTATATGAAC ACTGCATTAG CGTATCTGCT CATTGTCTG CATCTCTTTC  
9841 AGACACTGTG TAAAAGCAG GGAATTTTCC TTATGTCTCT TTCATCACAA TATTCCTGAC  
9901 ATTGCAAAGC TCCTGAGAAA TAACTCAGA TTCCCACTTT TCCTAGGGAG GTCTTCCTGG  
9961 ATGAGAACAA TCAATCATCT TAACTGTAAC TAGATATTC TGCATCTAAG AATAATCTTT  
10021 GTTAAAATA TATTCTCTCT CTCTTTTTT TTTTTTTGG TTCTCCAGCA AGAAAGCAAA  
10081 CCTGTGCAGA TGATGTGGAT CC
